1 **Multiscale ATUM-FIB microscopy enables targeted ultrastructural analysis**  
2 **at isotropic resolution**

3

4 Georg Kislinger<sup>1,2,3</sup>, Helmut Gnägi<sup>4</sup>, Martin Kerschensteiner<sup>3,5,6</sup>, Mikael Simons<sup>1,2,3</sup>, Thomas  
5 Misgeld<sup>1,2,3</sup>, Martina Schifferer<sup>2,3,\*</sup>

6

7 <sup>1</sup>Institute of Neuronal Cell Biology, Technical University Munich, Munich, Germany

8 <sup>2</sup>German Center for Neurodegenerative Diseases (DZNE), Munich, Germany

9 <sup>3</sup>Munich Cluster of Systems Neurology (SyNergy), Munich, Germany

10 <sup>4</sup>Diatome SA, Helmstrasse 1, 2560 Nidau, Switzerland

11 <sup>5</sup>Institute of Clinical Neuroimmunology, University Hospital, Ludwig-Maximilians-Universität  
12 München, Munich, Germany

13 <sup>6</sup>Biomedical Center (BMC), Faculty of Medicine, Ludwig-Maximilians-Universität München,  
14 Martinsried, Germany

15

16 \*Correspondence to: M. Schifferer (Email: [martina.schifferer@dzne.de](mailto:martina.schifferer@dzne.de))

## 17 **Abstract**

18 Volume electron microscopy enables the ultrastructural analysis of biological tissues and is  
19 essential for dense reconstructions e.g. of neuronal circuits. So far, three-dimensional analysis  
20 is based on either serial sectioning followed by sequential imaging (ATUM, ssTEM/SEM) or  
21 serial block-face imaging (SB-SEM, FIB-SEM), where imaging is intercalated with sectioning.  
22 Currently, the techniques involving ultramicrotomy allow scanning large fields of view, but  
23 afford only limited z-resolution determined by section thickness, while ion beam-milling  
24 approaches yield isotropic voxels, but are restricted in volume size. Now we present a hybrid  
25 method, named ATUM-FIB, which combines the advantages of both approaches: ATUM-FIB  
26 is based on serial sectioning of tissue into semithick (2-10  $\mu\text{m}$ ) resin sections that are collected  
27 onto transparent tape. 3D information obtained by serial light and electron microscopy allows  
28 identifying regions of interest that are then directly accessible for targeted FIB-SEM. The set  
29 of serial semithin sections thus represent a tissue ‘library’, which provides information about  
30 microscopic tissue context that can then be probed ‘on demand’ by local high resolution  
31 analysis. We demonstrate the potential of this technique to reveal the ultrastructure of rare but  
32 pathologically important events by identifying microglia contact sites with amyloid plaques in  
33 a mouse model for familial Alzheimer’s disease.

34

## 35 **Introduction**

36 Since the completion of the first connectomics data set (White, Southgate, Thomson, &  
37 Brenner, 1986) volume EM techniques have been substantially refined and advanced. While  
38 the interest in deciphering neuronal networks was the major driving force behind these  
39 technological developments, three-dimensional (3D) ultrastructural analysis has attracted  
40 considerable recent attention in a wide range of biological fields (Titze & Genoud, 2016).  
41 Applications range from classical cell biological questions to developmental, neuro- and cancer  
42 biology to microbiology and botany (Karreman, 2014). Currently, 3D ultrastructure can be  
43 solved by destructive techniques including serial block-face electron microscopy (SB-SEM)  
44 (Briggman, Helmstaedter, & Denk, 2011; Denk & Horstmann, 2004; Helmstaedter et al., 2013;  
45 Mikula & Denk, 2015) or focused ion beam-scanning electron microscopy (FIB-SEM)  
46 (Heymann et al., 2006; Knott, Marchman, Wall, & Lich, 2008; Sonomura et al., 2013). While  
47 these methods benefit from high alignment accuracy, they lack the option of reacquisition and  
48 hierarchical imaging (Kornfeld & Denk, 2018). Alternatively, serial sectioning for transmission

49 microscope camera array (TEMCA (Bock et al., 2011; Lee et al., 2016; Zheng et al., 2018) or  
50 automated tape-collecting ultramicrotomy (ATUM) (K. J. Hayworth et al., 2014; Hildebrand et  
51 al., 2017; Kasthuri et al., 2015; Mikula & Denk, 2015; Morgan, Berger, Wetzel, & Lichtman,  
52 2016; Schalek et al., 2011; Terasaki et al., 2013; Tomassy et al., 2014) allow repetitive  
53 acquisition of the same or other regions of interest. However, as ultramicrotomy-based  
54 approaches are limited by their poor z resolution of maximally 30 nm, ion milling techniques  
55 are required, if isotropic high resolution voxels are needed. Still, the imaging volume in FIB-  
56 SEM is limited to a few tens of microns due to the accumulation of milling artifacts caused by  
57 high-energy gallium ions (Xu et al., 2017). Despite recent advances in the application of  
58 alternative milling strategies (Kornfeld & Denk, 2018), targeted imaging is still required to  
59 restrict the acquisition volume. This is mainly achieved by correlated workflows involving  
60 targeted trimming guided by endogenous (Luckner et al., 2018) and artificial landmarks (Bishop  
61 et al., 2011; M. A. Karreman, Hyenne, Schwab, & Goetz, 2016; Matthia A. Karreman et al.,  
62 2014; Villani et al., 2019). X-ray micro computed tomography (microCT) (Bushong et al.,  
63 2015; Matthia A. Karreman et al., 2014; Sengle, Tufa, Sakai, Zulliger, & Keene, 2012; Villani  
64 et al., 2019) has emerged as a tool for facilitated ROI relocation within the processed EM  
65 sample. This not only bridges multiple scales, from millimeter to micrometer dimensions, but  
66 also puts the site of interest into a wider morphological context (Maire & Withers, 2014).  
67 However so far, microCT imaging options are not commonly accessible and the technique only  
68 provides a virtual map for subsequent guided destructive sample preparation. An alternative  
69 prescreening of embedded tissue at a larger scale is implemented by rendering it accessible to  
70 light and electron microscopy (EM) modalities. Ultrathick sectioning at 20  $\mu\text{m}$  by the hot knife  
71 method provides samples that are accessible to large-scale FIB-SEM (Kenneth J. Hayworth et  
72 al., 2015) enabling seamless reconstruction of large tissue blocks. While this method was  
73 designed for a complete reconstruction of big volumes, it would be desirable to reduce time and  
74 data load for biological questions requiring targeted ultrastructural analysis.

75 Here, we developed a multiscale method for targeted FIB-SEM on semithick (2-10  $\mu\text{m}$ ) sections  
76 named ATUM-FIB that combines the advantages of both ultramicrotomy-based and serial  
77 block face imaging approaches. This approach is based on the ultramicrotomy on partially cured  
78 (Droz, Rambourg, & Koenig, 1975) resin-embedded samples facilitated by a custom-built  
79 diamond knife with temperature control. Serial thick sections are then collected onto carbon  
80 nanotube (CNT) tape (Kubota et al., 2018), compatible with both serial bright-field and  
81 scanning electron microscopy (SEM). While providing direct physical access to isotropic high-

82 resolution imaging of multiple ROIs by FIB-SEM, this method at the same time provides 3D  
83 tissue context information and allows archiving samples for future extended analysis.

84

## 85 **Results**

### 86 **Semithick sections provide suitable information content for sparse ultramicrotomy-** 87 **guided targeting.**

88 Here, we developed a method that allows the search for an ultrastructural feature within a  
89 volume and the subsequent acquisition of a defined isotropic volume by FIB-SEM (Fig. 1). Our  
90 goal was to expose surfaces at defined distances by serial sectioning. While traditional ultrathin  
91 sectioning combined with sparse imaging saves imaging time, it is not compatible with the  
92 investigation of isotropic volumes. In order to overcome this limitation and optimize  
93 ultramicrotomy time as well as screening efficiency, the information content for FIB-SEM  
94 increases with section thickness, we therefore explored whether a “semithick” sections ranging  
95 from 0.5 to 10  $\mu\text{m}$  would meet these requirements (Fig. 2A). Moreover, we aimed to apply  
96 water instead of an oil bath (as used in the ultrathick partitioning approach (Kenneth J.  
97 Hayworth et al., 2015)) in order to avoid additional re-embedding and sectioning.

98 Semithick sections (0.5-10  $\mu\text{m}$ ) were generated using a diamond knife. Carbon nanotube (CNT)  
99 tape was chosen as a conductive and transparent section support for sequential light and electron  
100 microscopic assessment (Kubota et al., 2018). The wet tape with sections was placed onto a  
101 glass slide on a heating plate (80°C) for better adherence and imaged on a slide scanner (Fig.  
102 2B). Transmitted light investigation was possible for sections below 5  $\mu\text{m}$  as reduced  
103 transparency masked morphological details. The sections were transferred onto a silicon wafer  
104 and the surface scanned by backscattered detection SEM which enables the exploration of the  
105 entire semithick section range (Fig. 2C). We generated two consecutive sections with 2, 5 and  
106 10  $\mu\text{m}$  thickness and looked at traceability of neuronal cell bodies and blood vessels. While  
107 most of the structures could be recognized on the next 2  $\mu\text{m}$  section, alignment between two  
108 sections was difficult at thicknesses above 5  $\mu\text{m}$  (Fig. 2D). In summary, combined light  
109 microscopy and SEM with maximal FIB-SEM information content is optimal at 2  $\mu\text{m}$  while 5  
110  $\mu\text{m}$  sections can optimally be assessed by SEM surface imaging alone while conserving  
111 alignment of biological structures like cell bodies.

112

113 **Sequential resin curing and heating enables semithick sectioning and FIB milling on the**  
114 **same sample**

115 The generation of resin sections thicker than 2  $\mu\text{m}$  necessitated the optimization of resin  
116 characteristics and ultramicrotomy parameters. We therefore explored different contrasting  
117 methods and resins for semithick sectioning and subsequent SEM imaging. First, for  
118 contrasting, we settled on a standard rOTO (reduced osmium thiocarbohydrazide osmium)  
119 protocol without lead aspartate impregnation (Hua, Laserstein, & Helmstaedter, 2015), as post-  
120 contrasting strategies, e.g. incubation in uranylacetate in ethanol at 60°C would risk uneven  
121 stain distribution within and between thick sections (Kenneth J. Hayworth et al., 2015)(Locke  
122 & Krishnan, 1971). Second, we optimized the resin choice. Resin requirements for thick  
123 sectioning and ion milling are conflicting: For semithick sectioning, softer resin and less heavy  
124 metal staining would be favoured, while FIB-SEM requires hard resin and good contrasting to  
125 avoid charging artefacts. Various methacrylate (Norris, Baena, & Terasaki, 2017) but mainly  
126 epoxy resins including epon and durcupan (Kenneth J. Hayworth et al., 2015) have been used  
127 for standard ultrathin serial sectioning. We investigated rOTO-processed mouse cortex samples  
128 embedded in different resins by semithick sectioning and subsequent backscattered detection  
129 SEM (Fig. 3A). Regarding the sectioning characteristics, epon formulations as well as durcupan  
130 - which would be preferable for FIB-SEM - showed very uneven surface topology at thicknesses  
131 above 1  $\mu\text{m}$  (Fig. 3A). Tissue embedded in epoxy resin LX112-embedded tissue could be  
132 sectioned up to 2  $\mu\text{m}$  without major surface defects (Fig. 3A). We reasoned that a two-step  
133 curing (Droz et al., 1975) would yield in resin characteristics that are optimal for both,  
134 sectioning and FIB milling. Tissue embedded in LX112 was precured at 60°C for 10 and 48h.  
135 Semithick sections of up to 10  $\mu\text{m}$  could be generated from the 10h cured blocks (Fig. 3A).  
136 Resin blocks were too soft and sticky for sectioning after shorter curing periods (data not  
137 shown). After ultramicrotomy, sections were post-cured for 2d at 60°C ensuring beam  
138 resistance required for both serial SEM and FIB-SEM imaging. Still, semithick sectioning  
139 proved difficult even in this softer pre-cured resin, there for we explored a ‘hot knife’ approach  
140 (Kenneth J. Hayworth et al., 2015).

141 In order to facilitate semithick sectioning, we developed a heated diamond knife (Fig. 3B). We  
142 drilled holes into the 35° and 45° ultra boats for a temperature sensor (3 mm diameter) and a  
143 heater (6 mm diameter). For further temperature stability of the sample itself we installed  
144 infrared lights at both sides and adjusted the distance to the ultramicrotome sample arm to yield  
145 a sample temperature of 40 °C (Fig. 3B). At temperatures above 40°C, water evaporated onto

146 the sample block which partially melted (data not shown). We compared sectioning of rOTO  
147 processed mouse cortex precured for 10h in LX112 at 0.5-10  $\mu\text{m}$  thickness at room temperature,  
148 30°C and 40°C. Higher temperatures increased the smoothness of the section surface (Fig. 3A).  
149 At higher temperatures, the water pumping system supplying the knife boat had to be adapted  
150 to increased flow rates to compensate increased evaporation. Therefore, a good compromise for  
151 serial sectioning were temperatures in the range of 35-40°C. Comparison of 35° ultra- with 45°  
152 ultra knives didn't show major differences in semithick sectioning (data not shown), but higher  
153 long-term robustness is expected for the 45° knife (Matzelle, Gnaegi, Ricker, & Reichelt, 2003).  
154 Consequently, a combination of two-step curing of LX112 and heated ultramicrotomy allows  
155 for semithick sectioning at 0.5-10  $\mu\text{m}$ .

156

### 157 **Light and electron microscopy of serial semithick sectioning reveals ultrastructural** 158 **details for selection for FIB-SEM imaging.**

159 For volume analysis of cortical mouse tissue we collected serial semithick sections on CNT  
160 tape using a tape collector (Powertome, RMC) (Fig. 4A). Sections were collected at 0.2-0.3  
161 mm/sec with increased tape speed within and reduced tape speed outside the cutting window to  
162 assure the efficient and compact uptake. Slow speed was needed both for limiting compression  
163 and in order to keep the section longer on the heated water bath to smoothen. For test purposes,  
164 we cut 50 sections of mouse cortex tissue at 5  $\mu\text{m}$ . After sectioning and collection, the CNT  
165 tape was cut into 5 cm strips and reversibly adhered onto glass slides by application of a drop  
166 of water and incubation at 60° on a heating plate. For 5  $\mu\text{m}$  thick sections we acquired section  
167 overview images by transmitted light microscopy (Fig. 4A). Samples were mounted onto a  
168 silicon wafer as previously described (Djannatian et al., 2019; Kasthuri et al., 2015) and  
169 postcured. BSD images were captured at 4kV (Fig. 4B). Serial section images were taken at 0.2  
170 x 0.2 x 5  $\mu\text{m}$  and regions of interest at 0.01 x 0.01  $\mu\text{m}$ . The beam dwell time was reduced to  
171 values below 2  $\mu\text{s}/\text{pixel}$  in order to avoid charging artefacts originating from increased sample  
172 thickness. Some charging on blood vessels or nuclei could not be avoided. Maximum projections  
173 of mouse cortex revealed morphological features including blood vessels (Fig. 4B).

174 Mouse cortical sections with 5  $\mu\text{m}$  thickness were detached from the wafer and mounted onto  
175 a FIB-SEM stub by conducting carbon cement. A fine carbon layer was sputtered onto the  
176 sample providing surface accessibility for the electron beam while increasing conductivity.  
177 FIB-SEM was performed by milling a 8  $\mu\text{m}$  deep trench (Fig. 4C). We acquired a FIB-SEM of

178 a 30 x 30 x 5  $\mu\text{m}$  cortical region data at 5 x 5 x 5 nm (Fig. 4D). Resin postcuring resulted in  
179 good milling characteristics without curtaining effect or other problems arising from samples  
180 embedded in soft epon. In summary, semithick sections can be imaged by light or electron  
181 microscopy to reveal (ultrastructural) details required for target site selection (Fig. 4E). Selected  
182 regions on a particular section can be subjected to isotropic voxel acquisition by FIB-SEM.

183

#### 184 **Targeted FIB-SEM for isotropic ultrastructural analysis of amyloid plaques in FAD**

185 As a proof of concept we combined serial semithick sectioning with targeted FIB-SEM to  
186 analyze microglia contacting dystrophic neurites in the cortex of a familial AD mouse model.  
187 Familial Alzheimer's Disease (AD), the most common form of dementia in the elderly, causes  
188 gradual loss of memory, judgment and the ability to function socially. It is characterized by the  
189 presence of extracellular plaques composed of amyloid- $\beta$  ( $A\beta$ ) peptides and intracellular tau  
190 aggregates (Giacobini & Gold, 2013; Kwak et al., 2020). The plaques are surrounded by  
191 microglia, phagocytic immune cells which participate in the clearance of  $A\beta$  (Hemonnot, Hua,  
192 Ulmann, & Hirbec, 2019; Mattiace, Davies, Yen, & Dickson, 1990). The ultrastructure of  
193 amyloid plaques has, so far, been studied by TEM (Gowrishankar et al., 2015; Terry, Gonatas,  
194 & Weiss, 1964) but also by correlated light microscopy and FIB-SEM (Blazquez-Llorca et al.,  
195 2017). While the latter approach provides exact targeting of single events, ATUM-FIB allows  
196 unbiased sampling of cellular interactions around plaques. For ATUM-FIB, we collected 18  
197 consecutive sections at 5  $\mu\text{m}$  thickness onto CNT tape. 3D reconstruction of the light and  
198 electron micrographs revealed the amyloid plaque distribution in the resulting 90  $\mu\text{m}$ -thick  
199 volume, as well as the vasculature pattern and other morphological features (Fig. 5A,B).

200 We selected two consecutive sections containing a plaque surrounded by a microglial cell for  
201 FIB-SEM examination (Fig. 5A-C). The region of interest for the deposition of a protective  
202 carbon layer was relocated by overlaying the SEM image from the section series with a BSD  
203 image acquired at 8 kV. We imaged a 20 x 20 x 5  $\mu\text{m}$  volume at 5 x 5 x 5 nm by FIB-SEM  
204 (Fig. 5D). In order to reveal the strength of isotropic imaging we aligned the FIB-SEM volume  
205 and reconstructed different xz plane images of the microglial cell. The original SEM surface  
206 image was comparable to these virtual sections (Fig. 5E). Notably, we were able to stitch cross  
207 sections across consecutive sections (Fig. 5F), enabling extended z-volume analysis beyond 5  
208  $\mu\text{m}$ . Dystrophic neurites displayed ER structures at the contact sites opposing the microglial  
209 plasma membrane (Fig. 5G). While the target volume is resolved at high resolution and with

210 isotropic voxels, light and electron microscopic images of the surrounding tissue provide a  
211 morphological context. Moreover, the non-destructive nature of serial sectioning on tape allows  
212 for reinspection of other regions of interest at high resolution.

213

## 214 **Discussion**

215 Here, we introduce ATUM-FIB as a straightforward approach to combine overview imaging of  
216 tissue sections with targeted high-resolution three-dimensional reconstruction of subvolumes.  
217 In summary, ATUM-FIB has the following of advantages over previously developed 3D EM  
218 volume workflows (Fig. 6): (1) The ATUM-based generation of semithick sections allows  
219 screening of larger tissue volumes for rare events or specific sites of interest based on either  
220 light microscopic or low resolution SEM exploration of the semithin sections. Such sites can  
221 then be targeted by FIB-SEM with ~5 nm isotropic xyz resolution. Thereby, the high resolution  
222 volumes are put into a larger morphological context, similar to microCT investigations  
223 (Handsuh, Baeumler, Schwaha, & Ruthensteiner, 2013; Starborg et al., 2019), but with the  
224 advantage of providing direct access to target structures instead of coordinates. Moreover, this  
225 tissue context provides rich fiducial landmarks for correlated light/ electron microscopy  
226 (Luckner et al., 2018). (2) In contrast to standard ultrathin ssTEM/SEM or ATUM techniques,  
227 our approach results in 100-fold fewer sections that need to be archived. This saves time,  
228 simplifies handling and reduces cost. (3) Just as ATUM, ATUM-SEM is a non-destructive  
229 technique (except for the FIB-targeted areas), and thus preserves a library of semithin sections.  
230 These can be revisited to increase the number of detailed observations or explore new questions  
231 that emerge over time. The limitation in volume depth of ATUM-FIB due to the maximum  
232 thickness of semithick sections ( $\leq 5 \mu\text{m}$ ) compared to investigations of whole blocks, can be  
233 overcome by analysing the same region in consecutive semithick sections. Stitching of regions  
234 across serial sections has been successfully applied before for ultrathick partitioning (Kenneth  
235 J. Hayworth et al., 2015) as well as (S)TEM tomography (Aoyama, Takagi, Hirase, &  
236 Miyazawa, 2008; Baumeister, Grimm, & Walz, 1999; He & He, 2014), and has been shown to  
237 result in minimal loss of information (Kenneth J. Hayworth et al., 2015) (Suppl. Fig. 1). (4) In  
238 contrast to ultrathick partitioning (Kenneth J. Hayworth et al., 2015), surface SE/BSD  
239 information of consecutive semithick ATUM-FIB sections can be matched and aligned without  
240 the need FIB-SEM information of the containing tissue section. Moreover, there is no need to  
241 section into oil instead of standard water baths, which circumvents the need for re-embedding.



242 (5) With the adaptation of standard diamond knives, our method can be applied in any EM lab  
243 with established FIB-SEM and ATUM workflows without the need of further equipment. This  
244 includes the standard rOTO staining method employed, circumventing the need to establish  
245 novel en bloc contrasting protocols.

246 Based on these advantages, we envisage a broad range of applications, as the implementation  
247 is comparably simple and imaging modalities and section thickness can be flexibly adapted to  
248 scientific questions and biological tissues of interest. The information content of subsequent  
249 isotropic FIB-SEM investigations is especially suited for the analysis of organellar  
250 ultrastructure and cell-cell contacts in defined physiological or pathological circumstances  
251 previously screened on serial semithick sections. As an example of such an application, we here  
252 demonstrate that ATUM-FIB can reveal the ultrastructure of cellular contact sites between  
253 microglia and axons in amyloid plaques in FAD mouse cortex. The fact that ATUM-FIB  
254 preserves the tissue library and provides histology-like context, makes the method especially  
255 attractive in settings, where rare and precious samples are being archived for long-term  
256 reinvestigations. This includes material from complex treatment studies or correlated in vivo  
257 imaging/EM investigations (Follain, Mercier, Osmani, Harlepp, & Goetz, 2017; Matthia A.  
258 Karreman et al., 2014) in animals, but especially also for multi-scale investigations of human  
259 samples, e.g. brain biopsies that require cross-referencing with standard histopathology - and  
260 will be increasingly needed to validate ultrastructural findings, e.g. from animal models of  
261 disease (Lewis et al., 2019) (Jonkman et al., 2019; Shahmoradian et al., 2019).

262

## 263 **Acknowledgements**

264 This work was supported by DFG under Germany's Excellence Strategy within the framework  
265 of the Munich Cluster for Systems Neurology (EXC 2145 SyNergy—ID 390857198) and the  
266 TRR 274/1 2020 (project Z01; ID 408885537) T.M.'s lab was also supported by DFG  
267 FOR2879, A03 and SFB/TRR274, projects B03, C02. We thank Katalin Völgyi and Ozgun  
268 Gokce for providing fixed brain samples, Richard Schalek, Mark Terasaki and Gerhard Wanner  
269 for valuable scientific and technical advice and Felix Beyer and Kerstin Karg for technical  
270 assistance.

271

272

273 **Author contribution**

274 M.Sch., M.K., T.M., M.S. conceived the project, M.Sch. designed the experiments. G.K. and  
275 M.Sch. carried out experiments and analysed the data. H.G. adapted and provided the diamond  
276 knives. M.Sch. wrote the first draft and M.K., T.M., M.S. the final version of the manuscript.

277

278 **References**

- 279 Aoyama, K., Takagi, T., Hirase, A., & Miyazawa, A. (2008). STEM tomography for thick biological  
280 specimens. *Ultramicroscopy*, *109*(1), 70-80. doi:10.1016/j.ultramic.2008.08.005
- 281 Baumeister, W., Grimm, R., & Walz, J. (1999). Electron tomography of molecules and cells. *Trends Cell*  
282 *Biol*, *9*(2), 81-85. doi:10.1016/S0962-8924(98)01423-8
- 283 Bishop, D., Nikic, I., Brinkoetter, M., Knecht, S., Potz, S., Kerschensteiner, M., & Misgeld, T. (2011).  
284 Near-infrared branding efficiently correlates light and electron microscopy. *Nat Methods*, *8*(7),  
285 568-570. doi:10.1038/nmeth.1622
- 286 Blazquez-Llorca, L., Valero-Freitag, S., Rodrigues, E. F., Merchán-Pérez, Á., Rodríguez, J. R., Dorostkar,  
287 M. M., . . . Herms, J. (2017). High plasticity of axonal pathology in Alzheimer's disease mouse  
288 models. *Acta Neuropathologica Communications*, *5*(1), 14. doi:10.1186/s40478-017-0415-y
- 289 Bock, D. D., Lee, W. C., Kerlin, A. M., Andermann, M. L., Hood, G., Wetzel, A. W., . . . Reid, R. C. (2011).  
290 Network anatomy and in vivo physiology of visual cortical neurons. *Nature*, *471*(7337), 177-  
291 182. doi:10.1038/nature09802
- 292 Briggman, K. L., Helmstaedter, M., & Denk, W. (2011). Wiring specificity in the direction-selectivity  
293 circuit of the retina. *Nature*, *471*(7337), 183-188. doi:10.1038/nature09818
- 294 Bushong, E. A., Johnson, D. D., Kim, K.-Y., Terada, M., Hatori, M., Peltier, S. T., . . . Ellisman, M. H. (2015).  
295 X-Ray Microscopy as an Approach to Increasing Accuracy and Efficiency of Serial Block-Face  
296 Imaging for Correlated Light and Electron Microscopy of Biological Specimens. *Microscopy and*  
297 *Microanalysis*, *21*(1), 231-238. doi:10.1017/S1431927614013579
- 298 Denk, W., & Horstmann, H. (2004). Serial block-face scanning electron microscopy to reconstruct  
299 three-dimensional tissue nanostructure. *PLoS biology*, *2*(11), e329-e329.  
300 doi:10.1371/journal.pbio.0020329
- 301 Djannatian, M., Timmler, S., Arends, M., Luckner, M., Weil, M.-T., Alexopoulos, I., . . . Simons, M. (2019).  
302 Two adhesive systems cooperatively regulate axon ensheathment and myelin growth in the  
303 CNS. *Nature Communications*, *10*(1), 4794. doi:10.1038/s41467-019-12789-z
- 304 Droz, B., Rambourg, A., & Koenig, H. L. (1975). The smooth endoplasmic reticulum: structure and role  
305 in the renewal of axonal membrane and synaptic vesicles by fast axonal transport. *Brain Res*,  
306 *93*(1), 1-13. doi:https://doi.org/10.1016/0006-8993(75)90282-6
- 307 Follain, G., Mercier, L., Osmani, N., Harlepp, S., & Goetz, J. G. (2017). Seeing is believing – multi-scale  
308 spatio-temporal imaging towards *in vivo* cell biology. *Journal of Cell Science*,  
309 *130*(1), 23-38. doi:10.1242/jcs.189001
- 310 Giacobini, E., & Gold, G. (2013). Alzheimer disease therapy—moving from amyloid- $\beta$  to tau. *Nature*  
311 *Reviews Neurology*, *9*(12), 677-686. doi:10.1038/nrneuro.2013.223
- 312 Gowrishankar, S., Yuan, P., Wu, Y., Schrag, M., Paradise, S., Grutzendler, J., . . . Ferguson, S. M. (2015).  
313 Massive accumulation of luminal protease-deficient axonal lysosomes at Alzheimer's disease  
314 amyloid plaques. *Proceedings of the National Academy of Sciences*, *112*(28), E3699-E3708.  
315 doi:10.1073/pnas.1510329112
- 316 Handschuh, S., Baeumler, N., Schwaha, T., & Ruthensteiner, B. (2013). A correlative approach for  
317 combining microCT, light and transmission electron microscopy in a single 3D scenario.  
318 *Frontiers in zoology*, *10*(1), 44-44. doi:10.1186/1742-9994-10-44

- 319 Hayworth, K. J., Morgan, J. L., Schalek, R., Berger, D. R., Hildebrand, D. G., & Lichtman, J. W. (2014).  
320 Imaging ATUM ultrathin section libraries with WaferMapper: a multi-scale approach to EM  
321 reconstruction of neural circuits. *Front Neural Circuits*, 8, 68. doi:10.3389/fncir.2014.00068
- 322 Hayworth, K. J., Xu, C. S., Lu, Z., Knott, G. W., Fetter, R. D., Tapia, J. C., . . . Hess, H. F. (2015).  
323 Ultrastructurally smooth thick partitioning and volume stitching for large-scale connectomics.  
324 *Nature Methods*, 12, 319. doi:10.1038/nmeth.3292
- 325 He, W., & He, Y. (2014). Electron Tomography for Organelles, Cells, and Tissues. In J. Kuo (Ed.), *Electron*  
326 *Microscopy: Methods and Protocols* (pp. 445-483). Totowa, NJ: Humana Press.
- 327 Helmstaedter, M., Briggman, K. L., Turaga, S. C., Jain, V., Seung, H. S., & Denk, W. (2013). Connectomic  
328 reconstruction of the inner plexiform layer in the mouse retina. *Nature*, 500(7461), 168-174.  
329 doi:10.1038/nature12346
- 330 Hemonnot, A.-L., Hua, J., Ulmann, L., & Hirbec, H. (2019). Microglia in Alzheimer Disease: Well-Known  
331 Targets and New Opportunities. *Frontiers in aging neuroscience*, 11, 233-233.  
332 doi:10.3389/fnagi.2019.00233
- 333 Heymann, J. A., Hayles, M., Gestmann, I., Giannuzzi, L. A., Lich, B., & Subramaniam, S. (2006). Site-  
334 specific 3D imaging of cells and tissues with a dual beam microscope. *J Struct Biol*, 155(1), 63-  
335 73. doi:10.1016/j.jsb.2006.03.006
- 336 Hildebrand, D. G. C., Cicconet, M., Torres, R. M., Choi, W., Quan, T. M., Moon, J., . . . Engert, F. (2017).  
337 Whole-brain serial-section electron microscopy in larval zebrafish. *Nature*, 545(7654), 345-  
338 349. doi:10.1038/nature22356
- 339 Hua, Y., Laserstein, P., & Helmstaedter, M. (2015). Large-volume en-bloc staining for electron  
340 microscopy-based connectomics. *Nature Communications*, 6, 7923. doi:10.1038/ncomms8923
- 341 Jonkman, L. E., Graaf, Y. G.-d., Bulk, M., Kaaij, E., Pouwels, P. J. W., Barkhof, F., . . . van de Berg, W. D.  
342 J. (2019). Normal Aging Brain Collection Amsterdam (NABCA): A comprehensive collection of  
343 postmortem high-field imaging, neuropathological and morphometric datasets of non-  
344 neurological controls. *NeuroImage: Clinical*, 22, 101698.
- 345 Karreman, M. A., Hyenne, V., Schwab, Y., & Goetz, J. G. (2016). Intravital Correlative Microscopy:  
346 Imaging Life at the Nanoscale. *Trends Cell Biol*, 26(11), 848-863. doi:10.1016/j.tcb.2016.07.003
- 347 Karreman, M. A., Mercier, L., Schieber, N. L., Shibue, T., Schwab, Y., & Goetz, J. G. (2014). Correlating  
348 intravital multi-photon microscopy to 3D electron microscopy of invading tumor cells using  
349 anatomical reference points. *PloS one*, 9(12), e114448-e114448.  
350 doi:10.1371/journal.pone.0114448
- 351 Kasthuri, N., Hayworth, K. J., Berger, D. R., Schalek, R. L., Conchello, J. A., Knowles-Barley, S., . . .  
352 Lichtman, J. W. (2015). Saturated Reconstruction of a Volume of Neocortex. *Cell*, 162(3), 648-  
353 661. doi:10.1016/j.cell.2015.06.054
- 354 Knott, G., Marchman, H., Wall, D., & Lich, B. (2008). Serial section scanning electron microscopy of  
355 adult brain tissue using focused ion beam milling. *J Neurosci*, 28(12), 2959-2964.  
356 doi:10.1523/jneurosci.3189-07.2008
- 357 Kornfeld, J., & Denk, W. (2018). Progress and remaining challenges in high-throughput volume electron  
358 microscopy. *Current Opinion in Neurobiology*, 50, 261-267.
- 359 Kubota, Y., Sohn, J., Hatada, S., Schurr, M., Straehle, J., Gour, A., . . . Kawaguchi, Y. (2018). A carbon  
360 nanotube tape for serial-section electron microscopy of brain ultrastructure. *Nature*  
361 *Communications*, 9(1), 437. doi:10.1038/s41467-017-02768-7
- 362 Kwak, S. S., Washicosky, K. J., Brand, E., von Maydell, D., Aronson, J., Kim, S., . . . Kim, D. Y. (2020).  
363 Amyloid- $\beta$ 42/40 ratio drives tau pathology in 3D human neural cell culture models of  
364 Alzheimer's disease. *Nature Communications*, 11(1), 1377. doi:10.1038/s41467-020-15120-3
- 365 Lee, W. C., Bonin, V., Reed, M., Graham, B. J., Hood, G., Glattfelder, K., & Reid, R. C. (2016). Anatomy  
366 and function of an excitatory network in the visual cortex. *Nature*, 532(7599), 370-374.  
367 doi:10.1038/nature17192

- 368 Lewis, A. J., Genoud, C., Pont, M., van de Berg, W. D., Frank, S., Stahlberg, H., . . . Al-Amoudi, A. (2019).  
369 Imaging of post-mortem human brain tissue using electron and X-ray microscopy. *Curr Opin*  
370 *Struct Biol*, 58, 138-148. doi:10.1016/j.sbi.2019.06.003
- 371 Locke, M., & Krishnan, N. (1971). Hot alcoholic phosphotungstic acid and uranyl acetate as routine  
372 stains for thick and thin sections. *J Cell Biol*, 50(2), 550-557. doi:10.1083/jcb.50.2.550
- 373 Luckner, M., Burgold, S., Filser, S., Scheungrab, M., Niyaz, Y., Hummel, E., . . . Herms, J. (2018). Label-  
374 free 3D-CLEM Using Endogenous Tissue Landmarks. *iScience*, 6, 92-101.  
375 doi:10.1016/j.isci.2018.07.012
- 376 Maire, E., & Withers, P. J. (2014). Quantitative X-ray tomography. *International Materials Reviews*,  
377 59(1), 1-43. doi:10.1179/1743280413Y.0000000023
- 378 Mattiace, L. A., Davies, P., Yen, S. H., & Dickson, D. W. (1990). Microglia in cerebellar plaques in  
379 Alzheimer's disease. *Acta Neuropathologica*, 80(5), 493-498. doi:10.1007/BF00294609
- 380 Matzelle, T. R., Gnaegi, H., Ricker, A., & Reichelt, R. (2003). Characterization of the cutting edge of glass  
381 and diamond knives for ultramicrotomy by scanning force microscopy using cantilevers with a  
382 defined tip geometry. Part II. *J Microsc*, 209(Pt 2), 113-117. doi:10.1046/j.1365-  
383 2818.2003.01119.x
- 384 Mikula, S., & Denk, W. (2015). High-resolution whole-brain staining for electron microscopic circuit  
385 reconstruction. *Nat Methods*, 12(6), 541-546. doi:10.1038/nmeth.3361
- 386 Morgan, J. L., Berger, D. R., Wetzell, A. W., & Lichtman, J. W. (2016). The Fuzzy Logic of Network  
387 Connectivity in Mouse Visual Thalamus. *Cell*, 165(1), 192-206. doi:10.1016/j.cell.2016.02.033
- 388 Norris, R. P., Baena, V., & Terasaki, M. (2017). Localization of phosphorylated connexin 43 using serial  
389 section immunogold electron microscopy. *Journal of Cell Science*, 130(7), 1333.  
390 doi:10.1242/jcs.198408
- 391 Schalek, R., Kasthuri, N., Hayworth, K., Berger, D., Tapia, J., Morgan, J., . . . Lichtman, J. (2011).  
392 Development of High-Throughput, High-Resolution 3D Reconstruction of Large-Volume  
393 Biological Tissue Using Automated Tape Collection Ultramicrotomy and Scanning Electron  
394 Microscopy. *Microscopy and Microanalysis*, 17(S2), 966-967.  
395 doi:10.1017/S1431927611005708
- 396 Schindelin, J., Arganda-Carreras, I., Frise, E., Kaynig, V., Longair, M., Pietzsch, T., . . . Cardona, A. (2012).  
397 Fiji: an open-source platform for biological-image analysis. *Nat Methods*, 9(7), 676-682.  
398 doi:10.1038/nmeth.2019
- 399 Sengle, G., Tufa, S. F., Sakai, L. Y., Zulliger, M. A., & Keene, D. R. (2012). A Correlative Method for  
400 Imaging Identical Regions of Samples by Micro-CT, Light Microscopy, and Electron Microscopy:  
401 Imaging Adipose Tissue in a Model System. *Journal of Histochemistry & Cytochemistry*, 61(4),  
402 263-271. doi:10.1369/0022155412473757
- 403 Shahmoradian, S. H., Lewis, A. J., Genoud, C., Hench, J., Moors, T. E., Navarro, P. P., . . . Lauer, M. E.  
404 (2019). Lewy pathology in Parkinson's disease consists of crowded organelles and lipid  
405 membranes. *Nature Neuroscience*, 22(7), 1099-1109. doi:10.1038/s41593-019-0423-2
- 406 Sonomura, T., Furuta, T., Nakatani, I., Yamamoto, Y., Unzai, T., Matsuda, W., . . . Kaneko, T. (2013).  
407 Correlative analysis of immunoreactivity in confocal laser-scanning microscopy and scanning  
408 electron microscopy with focused ion beam milling. *Front Neural Circuits*, 7, 26.  
409 doi:10.3389/fncir.2013.00026
- 410 Starborg, T., O'Sullivan, J. D. B., Carneiro, C. M., Behnsen, J., Else, K. J., Grecis, R. K., & Withers, P. J.  
411 (2019). Experimental steering of electron microscopy studies using prior X-ray computed  
412 tomography. *Ultramicroscopy*, 201, 58-67.
- 413 Tapia, J. C., Kasthuri, N., Hayworth, K. J., Schalek, R., Lichtman, J. W., Smith, S. J., & Buchanan, J. (2012).  
414 High-contrast en bloc staining of neuronal tissue for field emission scanning electron  
415 microscopy. *Nat Protoc*, 7(2), 193-206. doi:10.1038/nprot.2011.439
- 416 Terasaki, M., Shemesh, T., Kasthuri, N., Klemm, R. W., Schalek, R., Hayworth, K. J., . . . Kozlov, M. M.  
417 (2013). Stacked endoplasmic reticulum sheets are connected by helicoidal membrane motifs.  
418 *Cell*, 154(2), 285-296. doi:10.1016/j.cell.2013.06.031

- 419 Terry, R. D., Gonatas, N. K., & Weiss, M. (1964). ULTRASTRUCTURAL STUDIES IN ALZHEIMER'S  
420 PRESENILE DEMENTIA. *The American journal of pathology*, 44(2), 269-297.
- 421 Titze, B., & Genoud, C. (2016). Volume scanning electron microscopy for imaging biological  
422 ultrastructure. *Biol Cell*, 108(11), 307-323. doi:10.1111/boc.201600024
- 423 Tomassy, G. S., Berger, D. R., Chen, H. H., Kasthuri, N., Hayworth, K. J., Vercelli, A., . . . Arlotta, P. (2014).  
424 Distinct profiles of myelin distribution along single axons of pyramidal neurons in the  
425 neocortex. *Science*, 344(6181), 319-324. doi:10.1126/science.1249766
- 426 Villani, A., Benjaminsen, J., Moritz, C., Henke, K., Hartmann, J., Norlin, N., . . . Peri, F. (2019). Clearance  
427 by Microglia Depends on Packaging of Phagosomes into a Unique Cellular Compartment. *Dev*  
428 *Cell*, 49(1), 77-88.e77. doi:10.1016/j.devcel.2019.02.014
- 429 White, J. G., Southgate, E., Thomson, J. N., & Brenner, S. (1986). The structure of the nervous system  
430 of the nematode *Caenorhabditis elegans*. *Philos Trans R Soc Lond B Biol Sci*, 314(1165), 1-340.  
431 doi:10.1098/rstb.1986.0056
- 432 Xu, C. S., Hayworth, K. J., Lu, Z., Grob, P., Hassan, A. M., Garcia-Cerdan, J. G., . . . Hess, H. F. (2017).  
433 Enhanced FIB-SEM systems for large-volume 3D imaging. *Elife*, 6. doi:10.7554/eLife.25916
- 434 Zheng, Z., Lauritzen, J. S., Perlman, E., Robinson, C. G., Nichols, M., Milkie, D., . . . Bock, D. D. (2018). A  
435 Complete Electron Microscopy Volume of the Brain of Adult *Drosophila melanogaster*. *Cell*,  
436 174(3), 730-743.e722. doi:10.1016/j.cell.2018.06.019

437

438

439

440

441

442

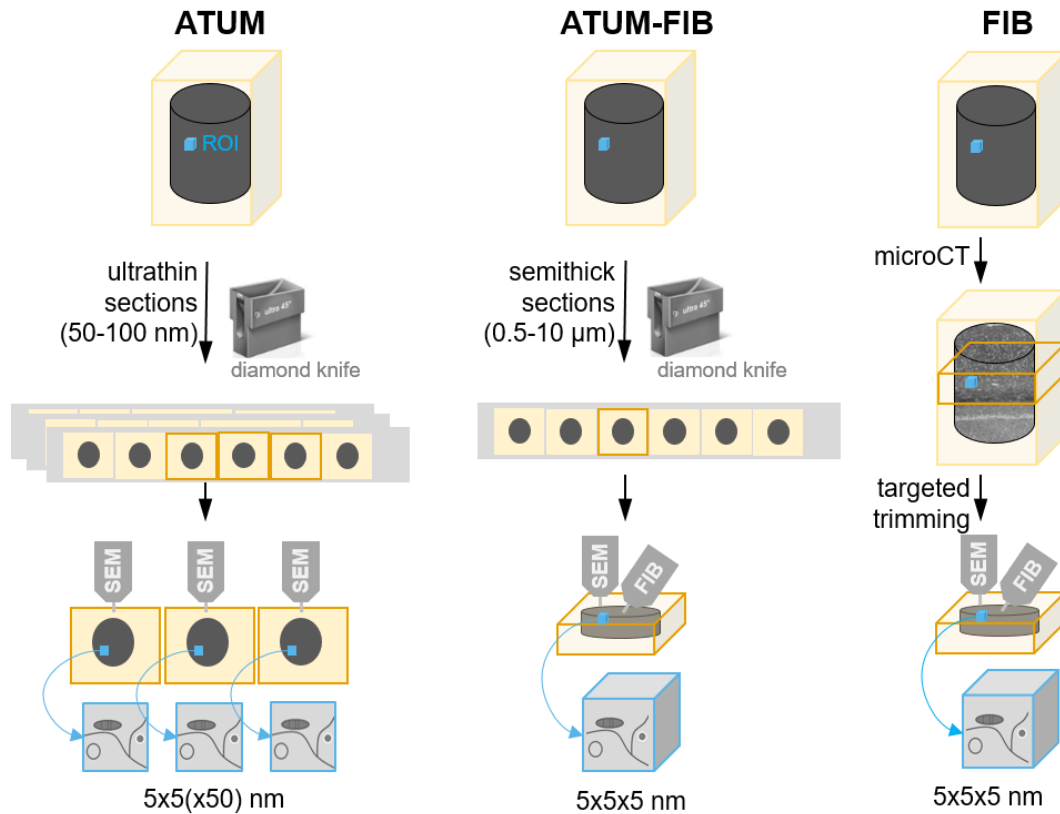

443

444 **Figure 1 – Principle of ATUM-FIB as a hybrid volume EM approach.** Schematic of  
445 existing techniques for targeted volume SEM and comparison to the new ATUM-FIB approach  
446 (middle). Both, ATUM and ATUM-FIB are microtomy-based, but ATUM-FIB generates  
447 semithick sections that can be selected by serial section light microscopy and SEM and  
448 subjected to further FIB-SEM investigation.

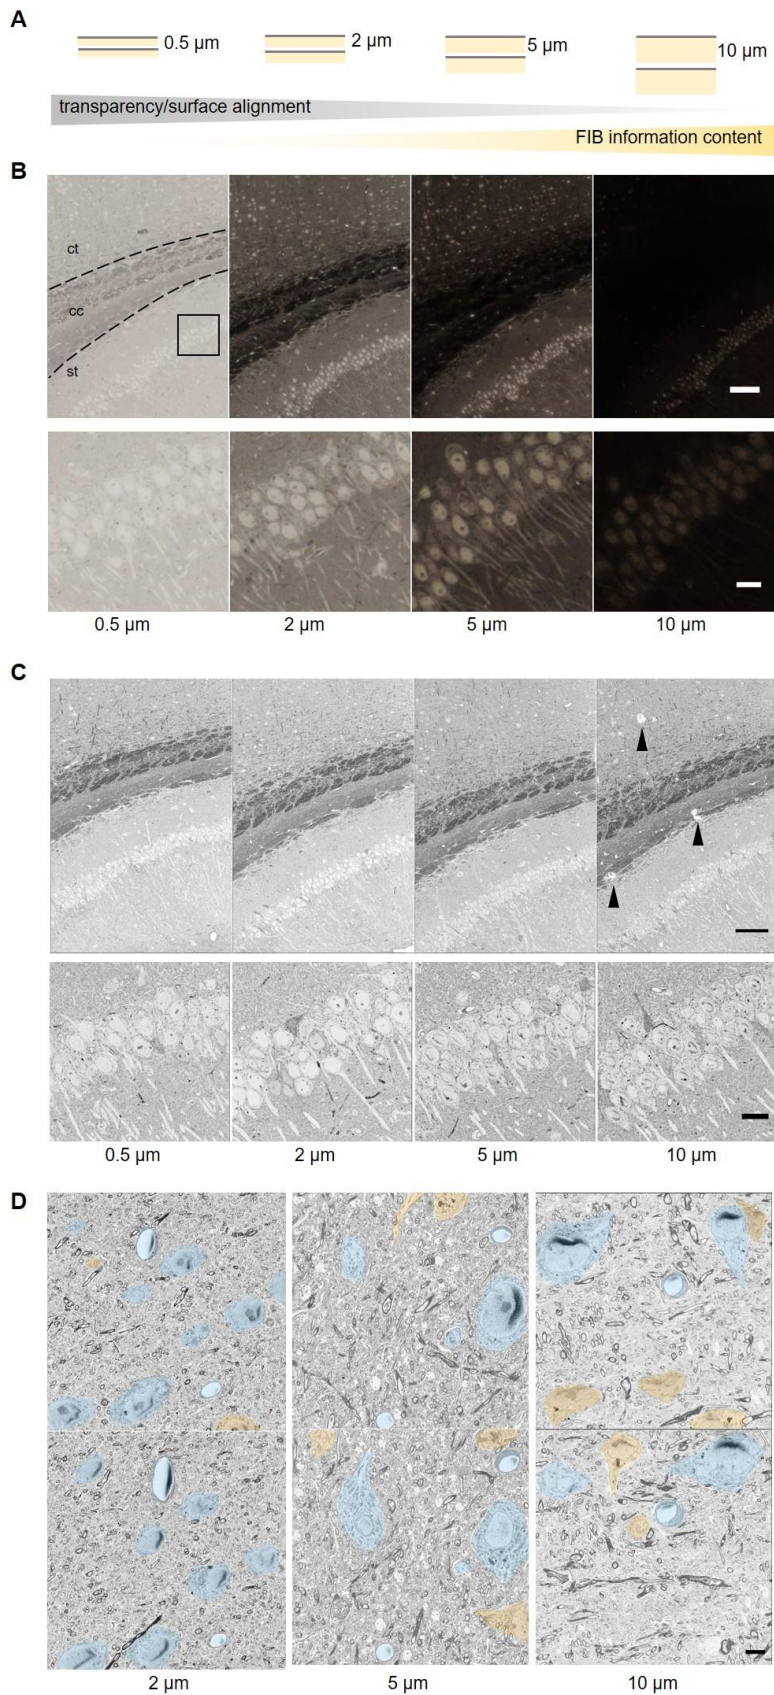

449

450 **Figure 2 – Targeting regions of interest by semithick sectioning.** (A) Cartoon of the  
451 information content of BSD surface imaging and the potential FIB-SEM analysis of sections of

452 different thickness. (B) Transmitted light and (C) BSD images of 0.5, 2, 5 and 10  $\mu\text{m}$  sections  
453 of mouse brain tissue. Corpus callosum (cc), cortex (ct), striatum (st). Scale bars 100  $\mu\text{m}$  (top),  
454 10  $\mu\text{m}$  (bottom). (D) Consecutive (upper, lower row) semithick (2, 5, 10  $\mu\text{m}$ ) sections allow  
455 tracing cell bodies and blood vessels across sections. Somata and blood vessels that can be  
456 followed from one to the next section are colored blue, others are shown in orange. Scale bar 5  
457  $\mu\text{m}$ .

458

459

460

461

462

463



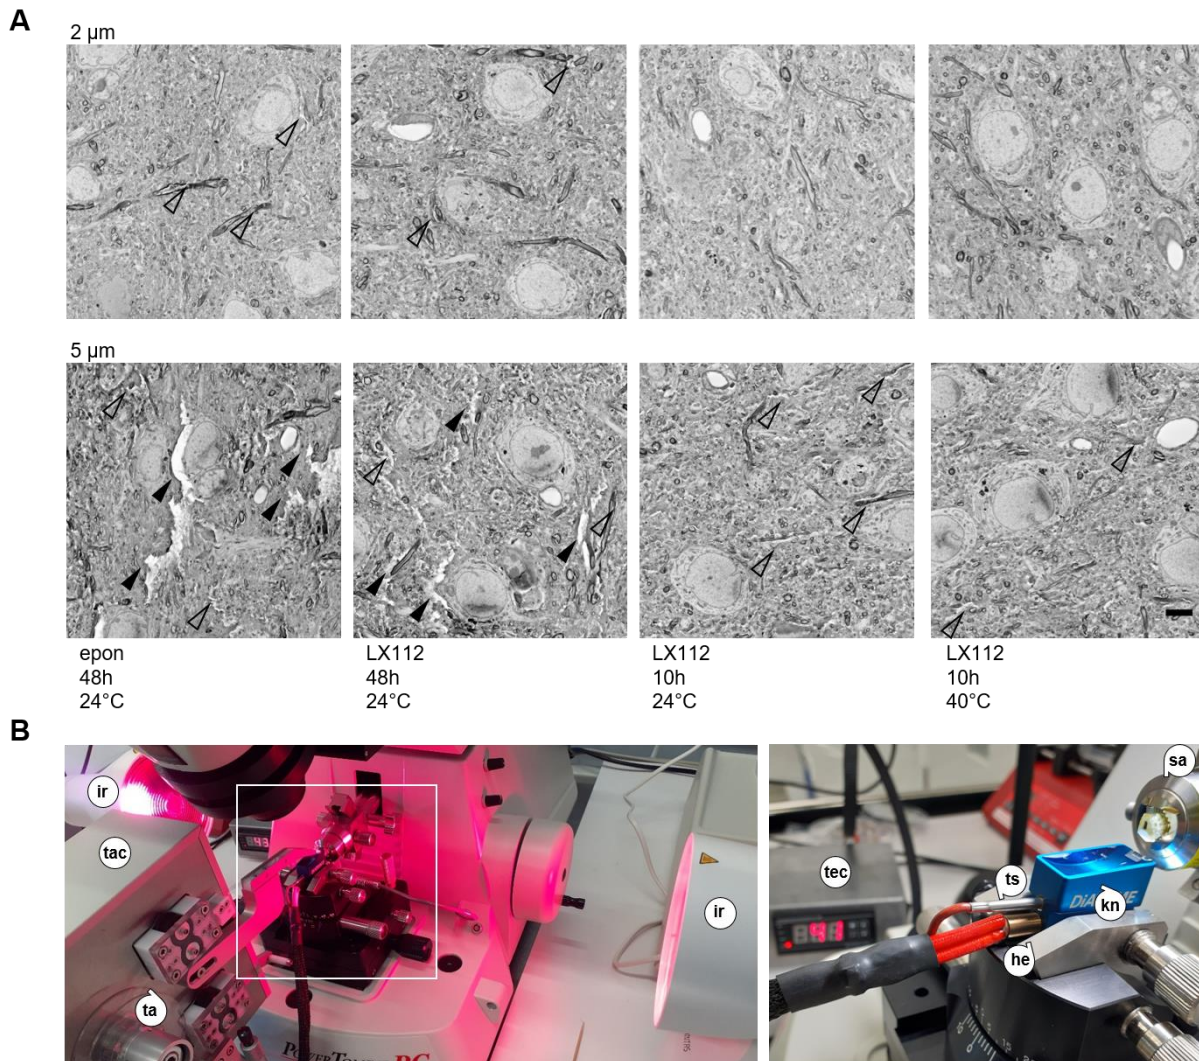

464

465 **Figure 3 – Generation of semithick sections by sequential curing and elevated-**  
466 **temperature microtomy.** (A) Comparison of resin performance for semithick sections of  
467 mouse cortex tissue. BSD images were acquired of 2 (top) and 5  $\mu\text{m}$  (bottom) semithick sections  
468 of epon and LX112 blocks cured for 48 or 10h and sectioned at room temperature or at 40°C.  
469 Left to right: epon cured for 48h, sectioned at 24°C; LX112 cured for 48h, sectioned at 24°C;  
470 LX112 cured for 10h, sectioned at 24°C; LX112 cured for 48h, sectioned at 40°C. Scale bar 5  
471  $\mu\text{m}$ . Arrowheads indicate major (full) and minor (open) tissue cracks. (B) Photographs of  
472 infrared lights installed at the sides of the microtome sample arm to warm the sample during  
473 semithick sectioning (left). The heated diamond knife is depicted with a lower heater and the  
474 upper sensor sticks and the temperature control (right). Heating element (he), infrared light (ir),  
475 sample arm (sa), tape (ta), tape collector (tac), temperature control (tec), temperature sensor  
476 (ts).

477

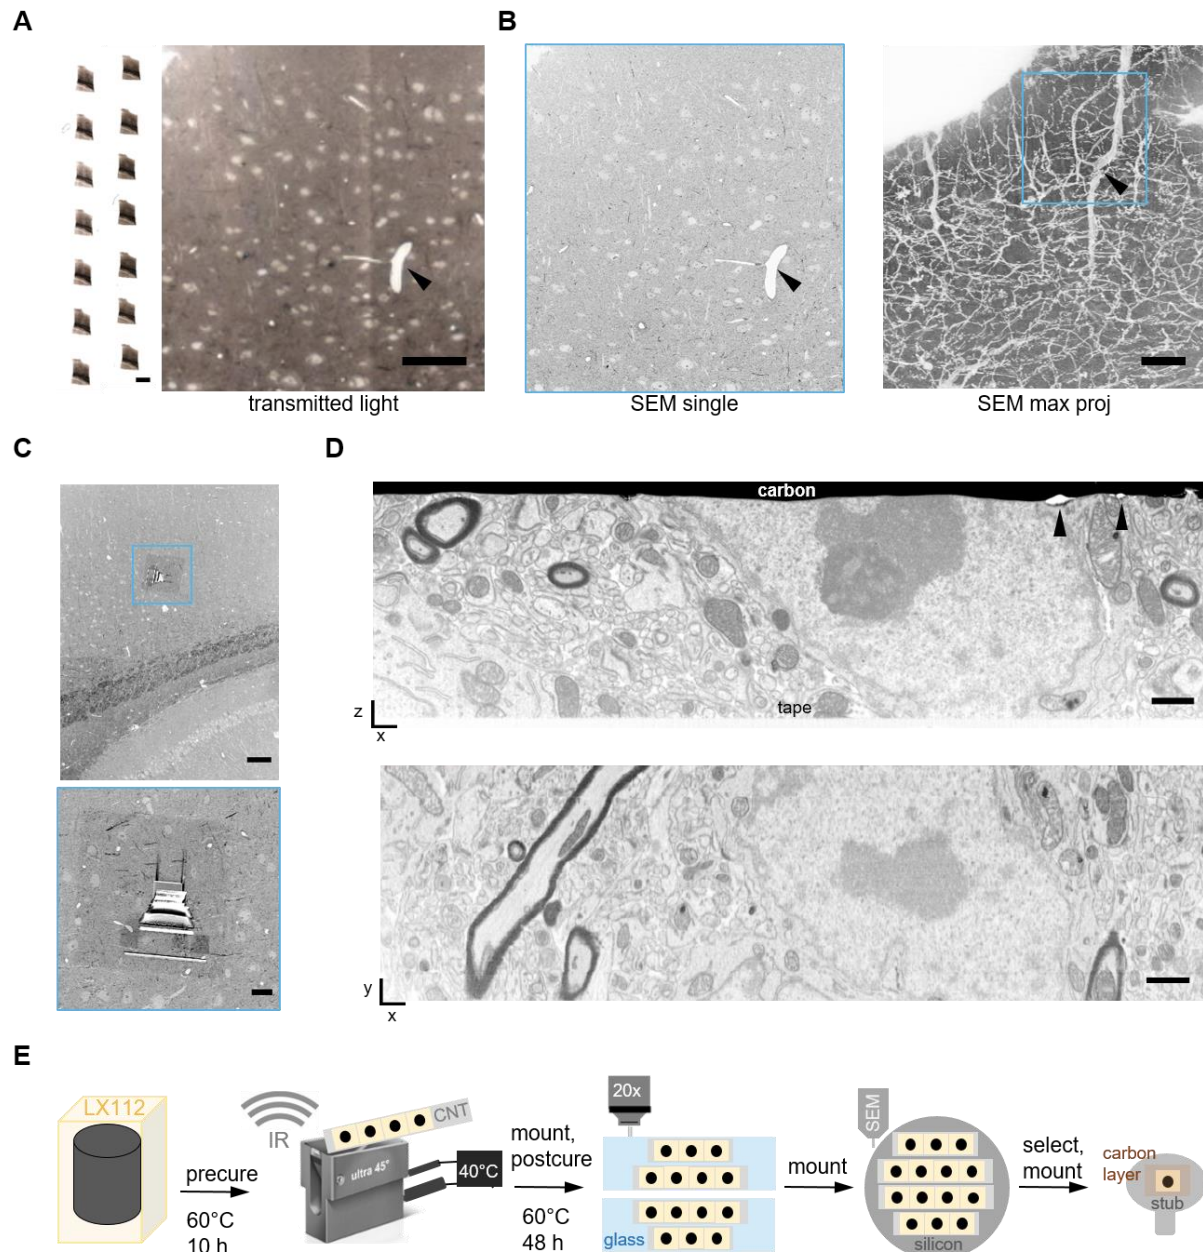

478

479 **Figure 4 – Serial semithick sectioning for targeted FIB-SEM.**

480 Serial 5  $\mu\text{m}$  sections of mouse cortex were collected on CNT tape. (A) Overview of several  
481 consecutive sections on tape (left) and a single transmitted light micrograph (20x objective,  
482 right). Scale bars 2 mm and 100  $\mu\text{m}$ , respectively. (B) BSD image (10x10x5000 nm) of one  
483 section (left) and maximum projection of all 50 sections showing blood vessel morphology  
484 (right). (C) A random cortical FIB target site was chosen (blue box) (top). The selected region  
485 was prepared for FIB-SEM by carbon deposition and trench milling (bottom). Scale bars 100  
486 and 10  $\mu\text{m}$ , respectively. (D) Cross section after FIB-SEM preparation showing the section –  
487 CNT tape adhesion site and the surface covered by a carbon layer (top). Defects in the surface  
488 layer topology are highlighted (arrowheads). After the FIB-SEM run a xy section was

489 reconstructed (bottom) from 2000 SE images (resolution  $5 \times 5 \times 5 \text{ nm}^3$ , bottom). Scale  $1 \mu\text{m}$ . (E)  
490 Schematic of the ATUM-FIB strategy: sequential resin (LX112) curing and heated microtomy  
491 are required for semithick sectioning. Serial sections are attached onto glass slides for light  
492 microscopy and remounted onto silicon wafers for serial SEM imaging and target selection. A  
493 section of interested is remounted, adhered onto a stub and carbon-coated for FIB-SEM  
494 examination.

495

496

497

498

499

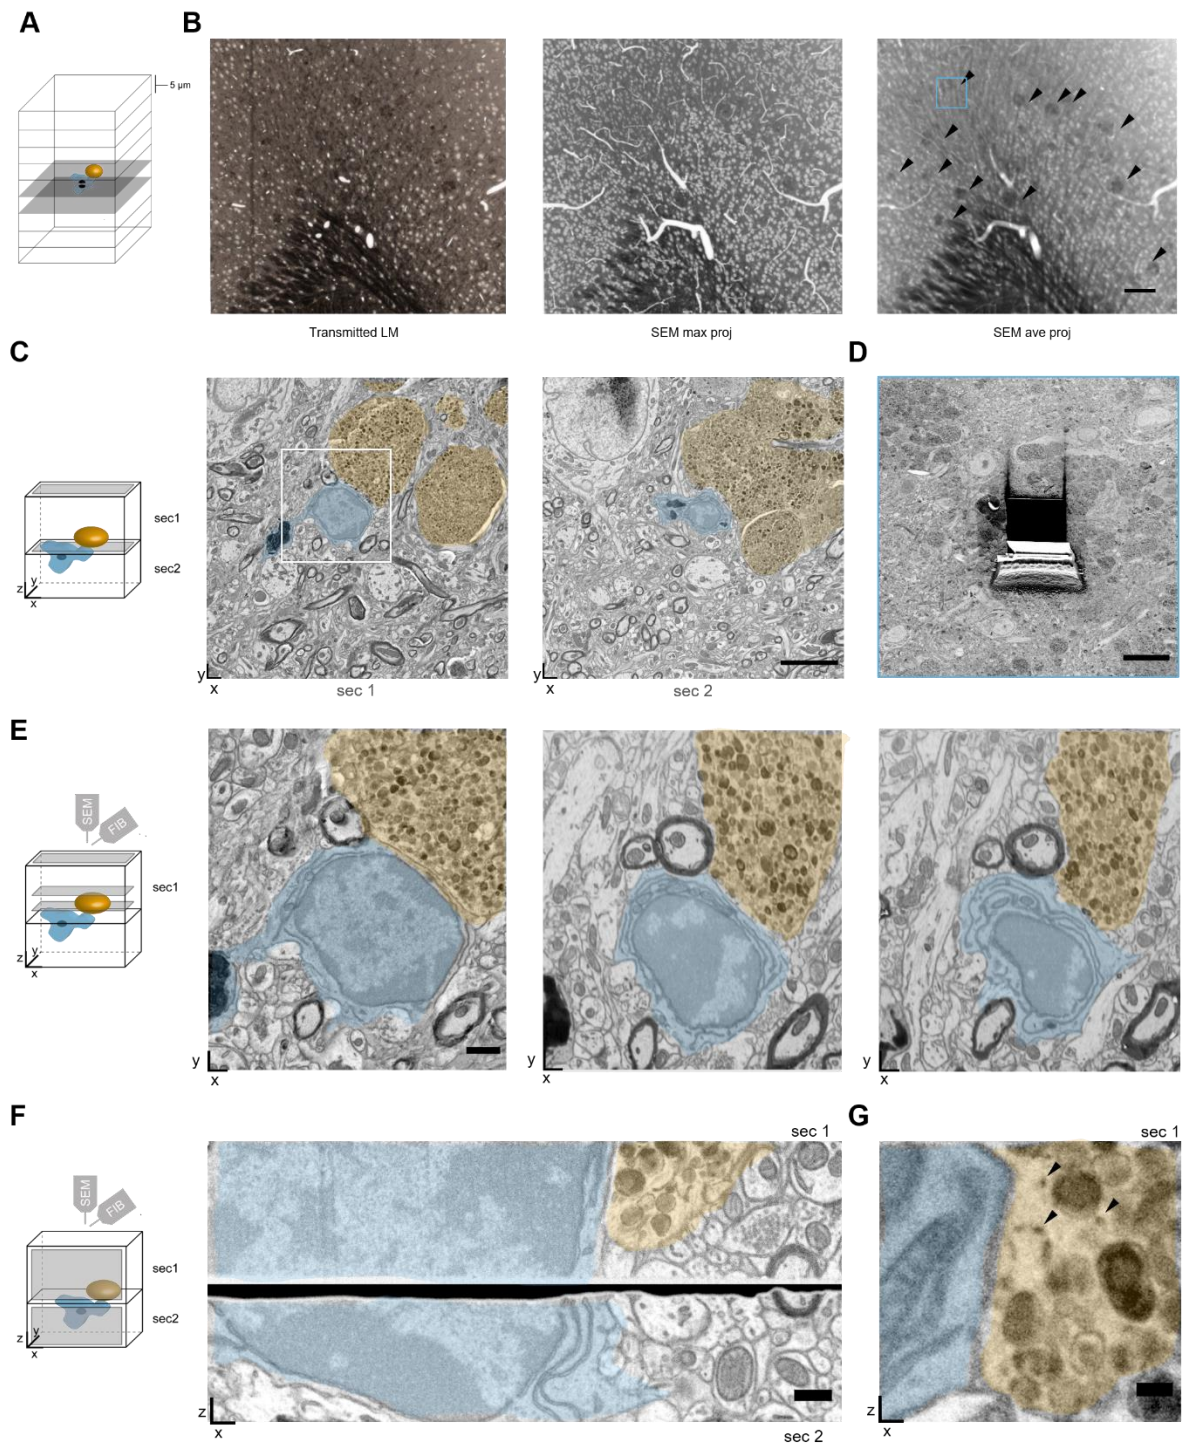

500

501 **Figure 5 – Targeted FIB-SEM on selected consecutive sites of semithick sections in FAD**  
502 **cortex samples.** (A) Schematic of ATUM-FIB on consecutive 5 μm sections of mouse FAD  
503 cortex samples. Microglia (blue) contacts to plaques (orange) are targeted. (B) Transmitted light  
504 image of one section (20x objective, left). Maximum projection of 18 consecutive section BSD  
505 images reveals blood vessel and neuronal cell body distribution (middle). In the average  
506 projection thereof the plaque pattern (arrowheads) and the location of the target plaque (blue  
507 box) are highlighted. Scale bars 100 μm. (C, E, F, G) Schematics showing the imaging planes

508 (grey) in the respective subfigures. (C) Two consecutive 5  $\mu\text{m}$  semithick sections of the FAD  
509 cortex sample on CNT tape. The microglial cell (blue) and dystrophic neurites (orange) are  
510 highlighted. The white box indicates the magnified image in (E). Scale bar 5  $\mu\text{m}$ . (D) Trench  
511 milled at the target site in section 1. (E) Magnified surface image of the microglia to plaque  
512 contact site of section 1 (left). This region was targeted for FIB-SEM at 5x5x5 nm.  
513 Reconstructions of two deeper levels within the semithick sections are shown (middle, right).  
514 Scale bar 1  $\mu\text{m}$ . (F) Stitched cross sections of corresponding areas in consecutive semithick  
515 sections 1 and 2 after FIB-SEM. Scale bar 500 nm. (G) Regions of interest of selected sections  
516 of a FIB-SEM run (section 1) revealing ER structures (arrowheads) at sites of contact between  
517 microglia and dystrophic neurites. Scale bar 200 nm.

518

519

520

521

522

523

524

525

526

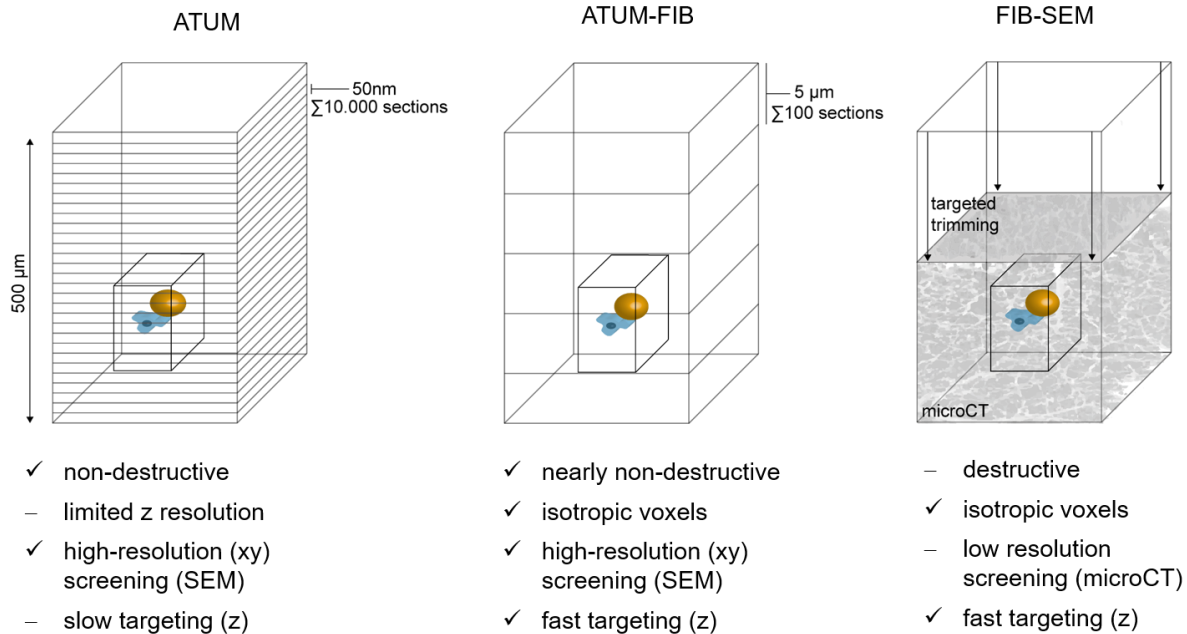

527

528 **Figure 6 – Comparison of volume SEM techniques for targeting rare events.** Structures of  
 529 interest like cell-cell interactions (microglia, magenta, dystrophic neurite, ocher) can be  
 530 visualized by volume EM techniques. Current approaches for targeted imaging involve  
 531 Automated Tape Collecting Ultramicrotomy (ATUM) and Focused Ion Beam Scanning EM  
 532 (FIB-SEM). ATUM-FIB combines the advantages of both approaches. High-precision targeting  
 533 based on ultrastructural features is enabled while increased section thickness reduces screening  
 534 time and complexity compared to ATUM. Targeted FIB-SEM targeting is usually based on  
 535 microCT data with limited xy resolution combined with trimming (arrows). A 500 µm z depth  
 536 would be covered by 100 (at 5 mm thickness, ATUM-FIB) instead of 10.000 (at 50 nm  
 537 thickness, ATUM) sections. Comparable to FIB-SEM, ATUM-FIB allows for acquisition of  
 538 the region of interest (black box) at isotropic voxels.

539

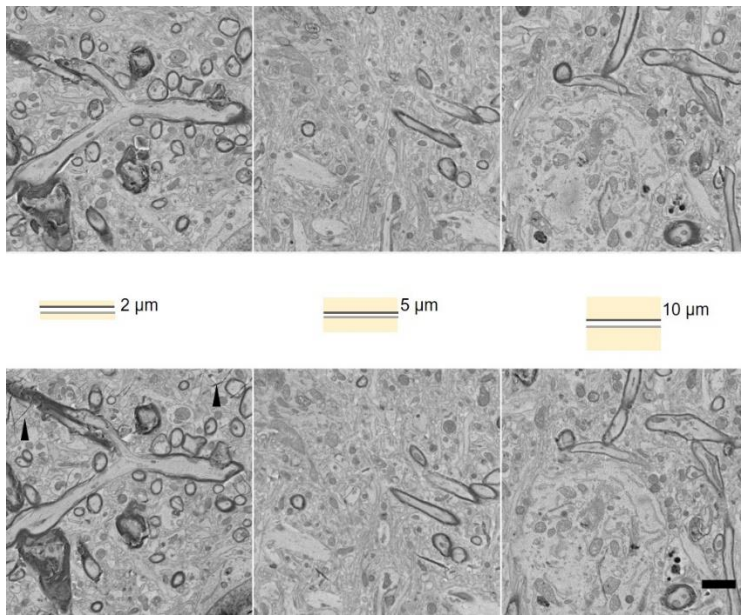

540

541 **Supplementary Figure 1 – Consecutive semithick section tissue loss.** (A) Schematics of  
542 opposing section surfaces revealing one section top face (light grey) and the bottom side of the  
543 consecutive one (dark grey). The remaining cross section thickness is shown in yellow. (B)  
544 Matching section BSD images of consecutive 2, 5 and 10 μm sections are shown. The first row  
545 shows the bottom of one section and the lower row the opposing surface of the following  
546 section. The latter were turned upside down and deposited on CNT tape. Folds (arrowhead)  
547 could not be prevented in this turning procedure of thinner sections (< 5μm). Scale bar 2 μm.

548 **Online Methods**

549

550 **Sample preparation**

551 FAD (2 months) and wt (18 months) mice were perfused with fixative containing 2.5%  
552 glutaraldehyde (Science Services), 2% PFA (Science Services) and 2 mM CaCl<sub>2</sub> in 0.1 M  
553 sodium cacodylate buffer (Science Services). Brains were dissected and transferred into fixative  
554 for incubation for two additional days. Tissue sections of max. 1mm thickness comprising  
555 cortex and corpus callosum regions were prepared.

556 Fixed samples were stained *en bloc* by a varied Hua rOTO protocol (Hua et al., 2015; Tapia et  
557 al., 2012) without lead aspartate staining. We applied a sequence of reduced 2% osmium  
558 tetroxide in 0.1 M cacodylate buffer pH 7.4 followed by 2.5% potassium hexacyanoferrate in  
559 the same buffer. After washes the tissue was incubated in 1% aqueous thiocarbohydrazide  
560 (TCH) and subsequently in 2% aqueous osmium tetroxide. After overnight incubation in 1%  
561 uranylacetate at 4°C and 2h in 50°C, samples were dehydrated and infiltrated at least 2h at  
562 different resin in acetone concentrations (25, 50, 75%) and overnight and for another 4h in  
563 100% of the respective resin. Durcupan (Science Services) resin was prepared by mixing 11.4  
564 g of component A (epoxy resin), 10.0 g of component B (964 hardener), 0.1 mL of component  
565 D (dibutyl phthalate) for the infiltration steps and the same mixture including component C  
566 (964 accelerator). For standard epon (Serva) 21.4 g glycidether 100 with 14.4 g  
567 dodecenylsuccinic anhydride (DDSA) and 11.3 g nadic methyl anhydride (NMA) were  
568 combined for 10 min and 0.84 mL 2,4,6 tris(dimethylaminomethyl)phenol (DMP-30) were  
569 added while stirring for another 20 min. LX112 resin (LADD) was prepared by mixing 4.5 g  
570 of mix A (mixture of 5 g of LX112 and 6,45 g of nonenyl succinic anhydride), 10.5 g of mix B  
571 (mixture of 5 g of LX112 and 4.35 g of NMA) and 0.6 ml of DMP-30 (all components from  
572 LADD research industries). Resins were cured at 60 °C for 10h, 15h or 48h.

573

574 **Automated tape-collection ultramicrotomy (ATUM)**

575 Epon blocks were roughly trimmed with EM TRIM2 (Leica) and subsequently, a rectangular  
576 tissue block (~ 2x1.5x0.2 μm) was exposed using the trimtool 45 diamond knife (Diatome).  
577 Thick sections were initially generated using a histo jumbo knife (45°, 6 mm, Diatome) in a  
578 RMC ultramicrotome (Powertome). The 35° and 45° ultra knife boats for the custom-made  
579 heated knives were provided by Diatome. Two holes (3 and 6 mm diameter, respectively) were  
580 milled into the base part of the knife boat to fit a temperature sensor (cable probe 3x30 mm,  
581 Sensorshop) and a heater (Hotend Heater Catridge CNC for 3D printer, 24V, 40W;



582 Sensorshop). We used a digital on/off temperature regulator (for PT100, Sensorhop). Standard  
583 infrared lights (230V, 150W, Conrad Electronics) were installed at both sides of the microtome.  
584 Temperature was controlled by standard probe (VWR) and infrared thermometers (Conrad  
585 Electronics) to values within the range of 35-45°C.  
586 Single sections were fished from the water bath by ~0.3x0.8 mm carbon nanotube tape (CNT)  
587 tape (Science Services) pieces using inverse forceps. For serial sectioning the RMC tape  
588 collector was adapted to the histo jumbo knife by bypassing the tension lever and guiding the  
589 CNT tape behind the knife directly to the collector nose. The spatial arrangement of the tape  
590 collector nose had to be adapted to the heating unit. Sectioning speed was set to 0.2-0.4 mm/sec  
591 with increased tape speed within (0.4 mm/sec) and reduced tape speed outside (0.1 mm/sec) the  
592 cutting window. This assured efficient uptake and minimization of empty intersection space on  
593 the tape. Slow speed was needed both for limiting compression, as well as for keeping the  
594 sections longer in the heated water bath to smoothen. If needed, sections were guided onto the  
595 tape collector using fine brushes.

596

#### 597 **Slide scanner serial light microscopy**

598 For light microscopic investigation, CNT tape strips with single sections or 5 cm strips with  
599 serial sections were positioned on a glass slide. For better adherence, a few drops of water were  
600 placed between tape and glass placed on a heating plate (80°C). Good adherence was important  
601 for tape flattening as a prerequisite of the slide scanner autofocusing function. Serial light  
602 microscopy was performed on a slide scanner (Pannoramic MIDI II 2.0.5, 3D Histech). We  
603 selected sections by thresholding and imaged using the autofocusing and the extended focus  
604 level (9 focus levels, focus step size 0.2 µm x 5) functions using the 20x objectives. By choosing  
605 the extended focus option, the software selects the sharpest image from each focus level for  
606 each image field, and combines them into one single image. The autofocus was restricted and  
607 the range set by testing it for several sections on different slide locations. Jpeg files were  
608 generated from the original data using the Pannoramic software CaseViewer2.2 (3D Histech).

609

#### 610 **Serial scanning electron microscopy**

611 Sections on glass slides were postcured for 30-48h at 60°C. CNT strips with tissue sections  
612 were detached and assembled onto carbon tape (Science Services), mounted onto a 4-inch  
613 silicon wafer (Siegert Wafer) and grounded with adhesive carbon tape. Serial section images  
614 were acquired on a Crossbeam Gemini 340 SEM (Zeiss) in backscatter mode at 4 keV (high

615 gain) at 7-8 mm WD and 30 or 60  $\mu\text{m}$  aperture. In ATLAS5 Array Tomography (Fibics, Ottawa,  
616 Canada) a wafer overview map at 1000-3000 nm/pixel was generated. On this basis, sections  
617 were mapped and imaged at medium (60 x 60 – 100 x 100 nm) resolution. Regions of interest  
618 from these section sets were acquired at 10x10 nm/pixel (2  $\mu\text{s}$  dwell time, line average 2). Image  
619 series were aligned in TrakEM2 using a combination of automated and manual processing,  
620 registered and analysed in Fiji (Schindelin et al., 2012).

621

### 622 **Focused Ion Beam Scanning Electron Microscopy (FIB-SEM)**

623 Selected thick sections on CNT tape were cut from the silicon wafer including the adhesive  
624 carbon tape underneath using a scalpel. These samples were mounted with conductive carbon  
625 cement (LEIT-C, Plano) and conductive silver colloid (Plano) onto standard aluminum stubs  
626 (Plano). A thin layer of carbon was sputtered onto the sections (carbon cord, Q150T ES,  
627 Quorum). Milling and imaging were performed on a Crossbeam Gemini 340 FIB-SEM  
628 operating under SmartSEM (Zeiss) and Atlas-3D (Fibics Incorporated). Ion beam currents of  
629 50 pA - 15 nA were used. The milling rate was set to 5 nm slices. SEM images were recorded  
630 with an aperture of 60  $\mu\text{m}$  in the high current mode at 2 kV of the InlenseDuo detector with the  
631 BSE grid set to 300-500 V and the SE detector. Voxel sizes of 5 x 5 x 5 nm were chosen. Images  
632 series of 1000-2000 consecutive sections were recorded. In ATLAS, the milling current and  
633 depth were adjusted to match with exposure time of the SEM (line average 2, dwell time 3  $\mu\text{s}$ ).  
634 Automatic correction of focus (auto tune) and astigmatism (auto stig) was applied every 30  
635 minutes. FIB-SEM image stacks were aligned and analyzed in Fiji (Schindelin et al., 2012).
